# Supplementary material for: Carbon dioxide hydrogenation to methanol over Cu/ZrO2/CNTs: effect of carbon surface chemistry
Source: Royal Society of Chemistry journal article supplement (doi:10.1039/c5ra04774a), 2015-01-01
Supplement: c5ra04774a1.pdf [file c5ra04774a1.pdf]

## Supporting Information

### Carbon Dioxide Hydrogenation to Methanol over Cu-ZrO<sub>2</sub>/CNTs: Effect of Carbon Surface Chemistry

Guannan Wang,<sup>[a]</sup> Limin Chen,<sup>\*,[a,b]</sup> Yuhai Sun,<sup>[a]</sup> Junliang Wu,<sup>[a]</sup> Mingli Fu,<sup>[a]</sup> Daiqi  
Ye<sup>\*,[a,b]</sup>

*<sup>[a]</sup> G.N. Wang, Prof. Dr. L.M. Chen, Y.H. Sun, Prof. Dr. J.L. Wu, Prof. Dr. M.L. Fu,  
Prof. Dr. D.Q. Ye, School of Environment and Energy, South China University of  
Technology, Guangzhou Higher Education Mega Centre, Guangzhou 510006, PR  
China. E-mail address: [liminchen@scut.edu.cn](mailto:liminchen@scut.edu.cn) (L.M. Chen), [cedqye@scut.edu.cn](mailto:cedqye@scut.edu.cn)  
(D.Q. Ye); Tel: 86-20-39389592.*

*<sup>[b]</sup> Prof. Dr. L.M. Chen, Prof. Dr. D.Q. Ye, Guangdong Provincial Key Laboratory of  
Atmospheric Environment and Pollution Control, South China University of  
Technology, Guangzhou Higher Education Mega Centre, Guangzhou 510006, PR  
China*

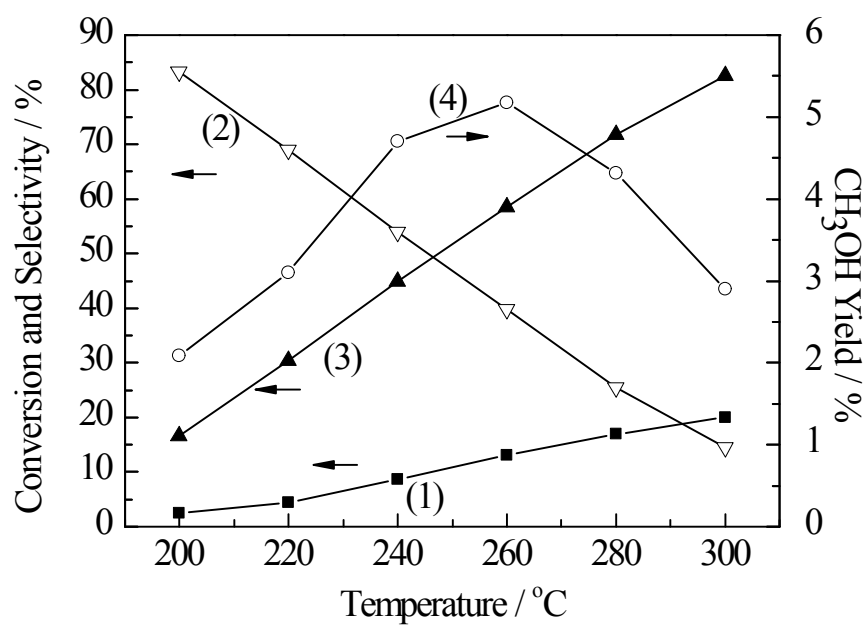

**S-1 The catalytic performance of 10wt% Cu/ZrO<sub>2</sub> catalyst without CNTs. (1) CO<sub>2</sub> Conversion; (2) CH<sub>3</sub>OH Selectivity; (3) CO Selectivity; (4) CH<sub>3</sub>OH Yield. Reaction condition: V(H<sub>2</sub>):V(CO<sub>2</sub>):V(N<sub>2</sub>) = 69:23:8, P = 3.0 MPa, GHSV = 3600 ml/(h·gcat)**

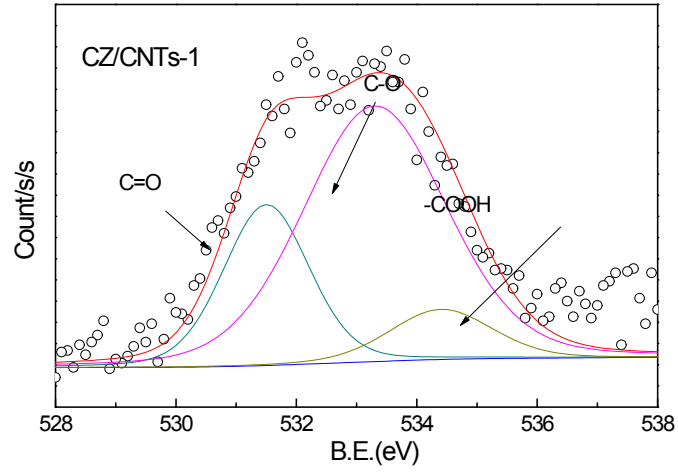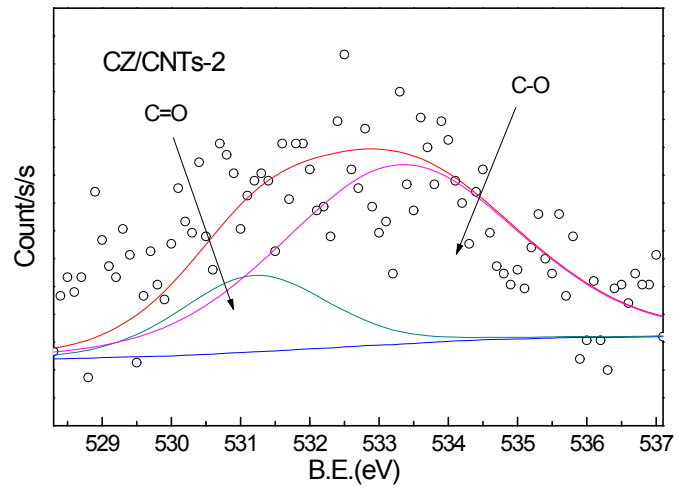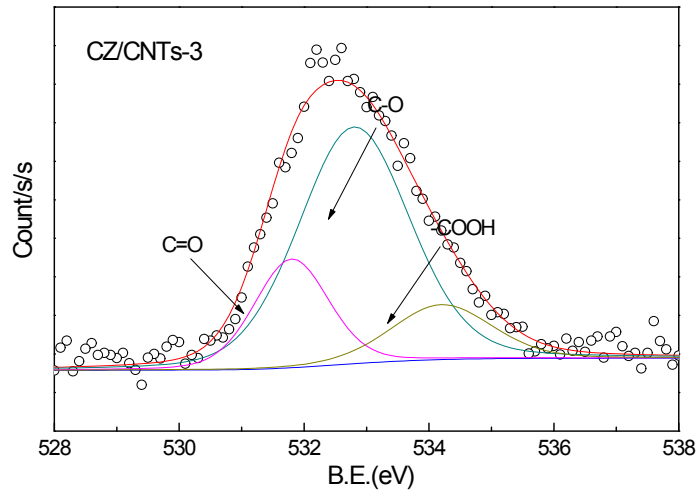

**S-2 XPS O1s spectra of various CNTs**

**S-3 Results of the fits of the XPS O1s region, values given in at.% of total intensity**

| Sample | Binding energy(eV) and groups |             |             |
|--------|-------------------------------|-------------|-------------|
|        | 531.0-531.8                   | 532.8-533.3 | 534.2-534.4 |
|        | C=O                           | -C-OH       | -COOH       |
| CNTs-1 | 22.7                          | 66.0        | 10.3        |
| CNTs-2 | 21.1                          | 78.9        | -           |
| CNTs-3 | 20.2                          | 66.0        | 14.8        |

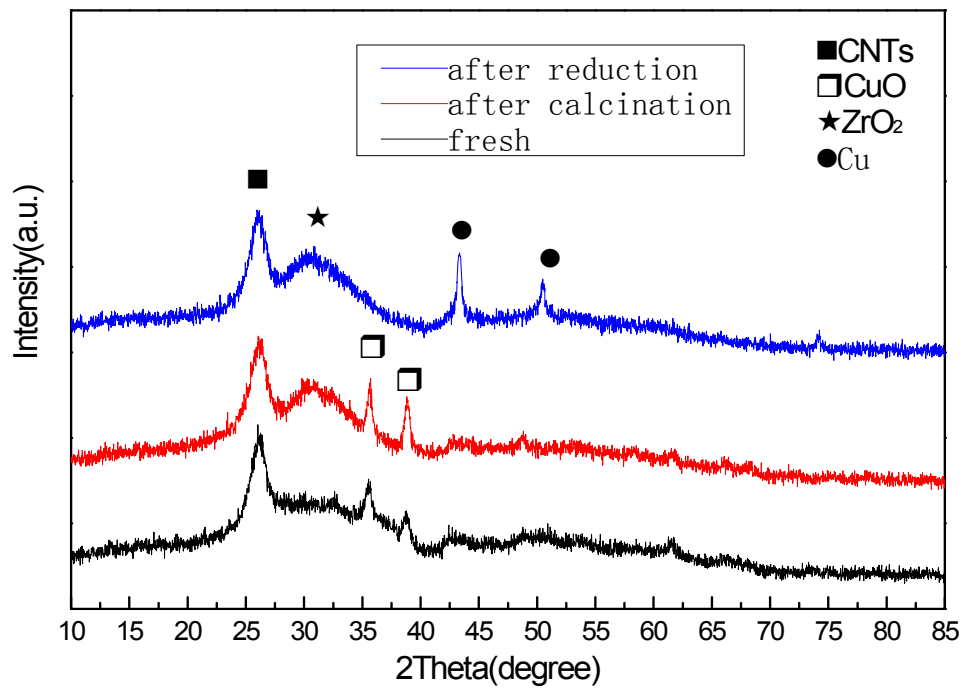

**S-4 XRD patterns of CZ/CNTs-1 after different treatment conditions during the preparation**

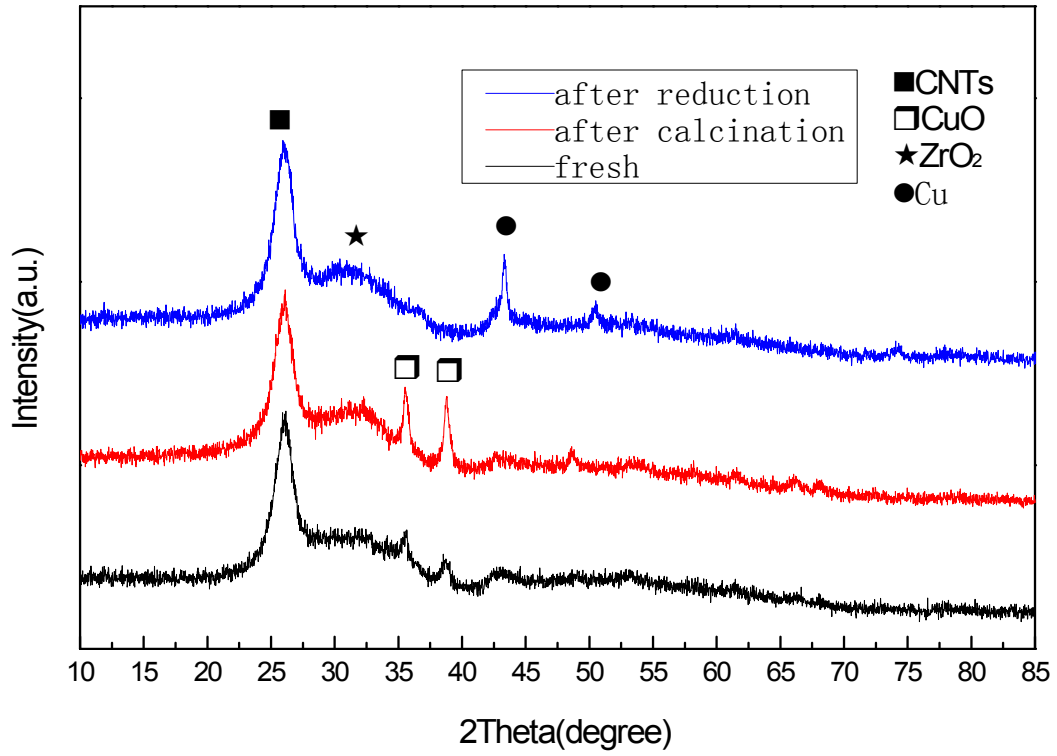

**S-5 XRD patterns of CZ/CNTs-2 after different treatment conditions during the preparation**
